# Supplementary material for: Overexpression of MALAT1 Relates to Lung Injury through Sponging miR-425 and Promoting Cell Apoptosis during ARDS
Source: Hindawi journal article supplement (doi:10.1155/2019/1871394), 2019-12-01
Supplement: f1 [file 1871394.f1.pdf]

Figure S1

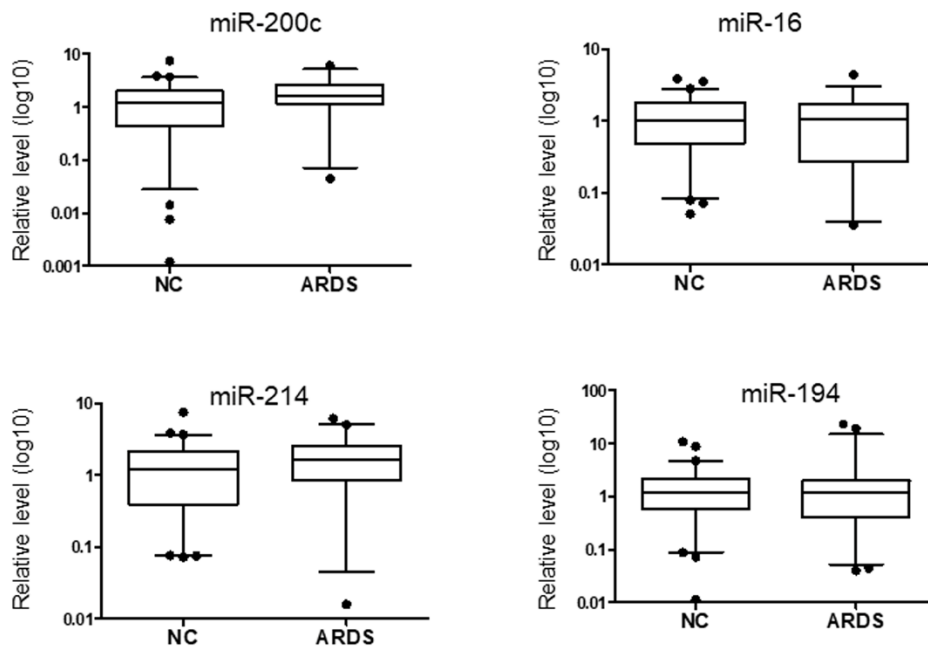

Fig.S1

Figure S2

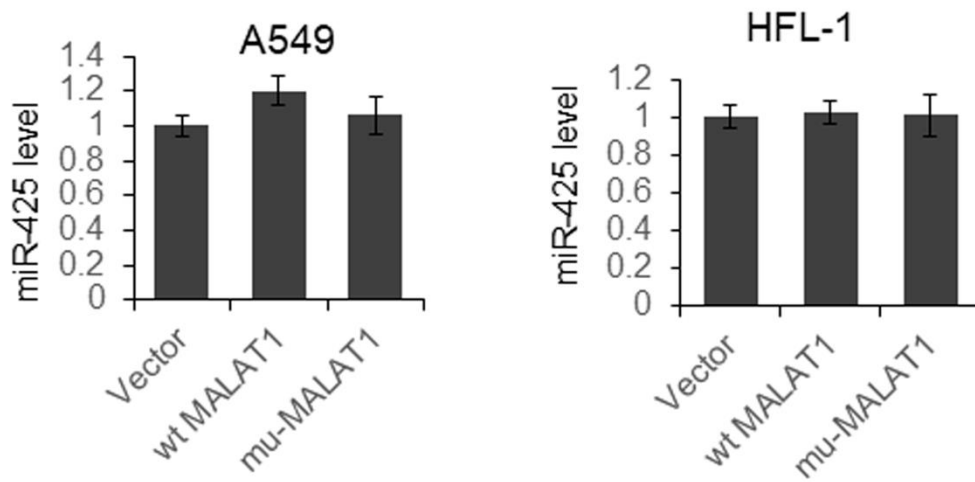

Fig.S2
